# Supplementary material
Source: PubMed Central journal article supplement (PMC7833889)
Supplement: mmc1.pdf [file mmc1.pdf]

# THE LANCET Oncology

## Supplementary appendix

This appendix formed part of the original submission and has been peer reviewed. We post it as supplied by the authors.

Supplement to: Clark JJ, Dwyer D, Pinwill N, Clark P, Johnson P, Hackshaw A. The effect of clinical decision making for initiation of systemic anticancer treatments in response to the COVID-19 pandemic in England: a retrospective analysis. *Lancet Oncol* 2020; published online Nov 27. [http://dx.doi.org/10.1016/S1470-2045\(20\)30619-7](http://dx.doi.org/10.1016/S1470-2045(20)30619-7).

## Online Supplementary Appendix

Figure S1: The number of SACT registrations between September 2019 and June 2020, according to type of therapy.

Figure S2: The number of SACT registrations between September 2019 and June 2020, for all solid tumours and all haematological malignancies, and gynaecological and colorectal cancers.

Figure S3: The number of SACT registrations between September 2019 and June 2020 for breast, prostate, lung, skin, renal, head and neck, and others (neuroendocrine tumours, thyroid, sarcoma, gastrointestinal stromal tumours and central nervous system).

Figure S4: The number of SACT registrations between September 2019 and June 2020, for selected haematological malignancies.

Figure S5: The total number of SACT registrations between April 2019 and June 2020.

Figures are only provided for specific tumour types where the mean monthly number of registrations during the control period was  $\geq 50$ .

Table S1. New indications introduced by the NHS via the Cancer Drugs Fund in April and May 2020 in response to the COVID pandemic

Table S2: Data used to create Figures 1-4 and Figures S1-S4.

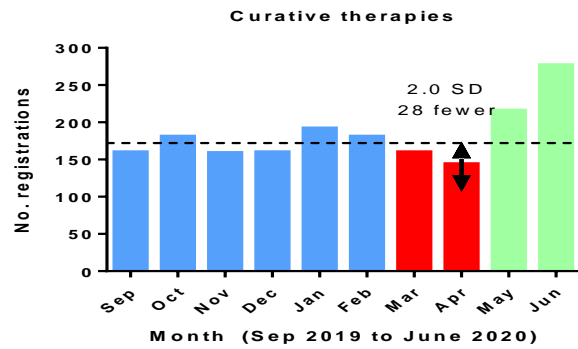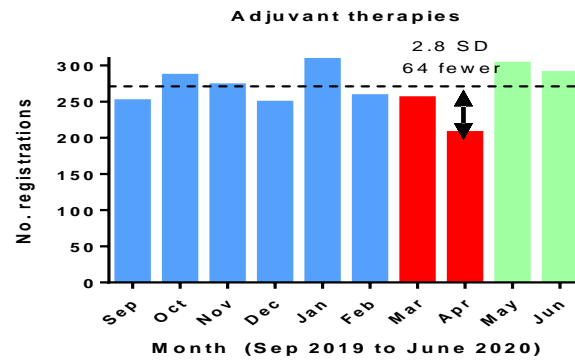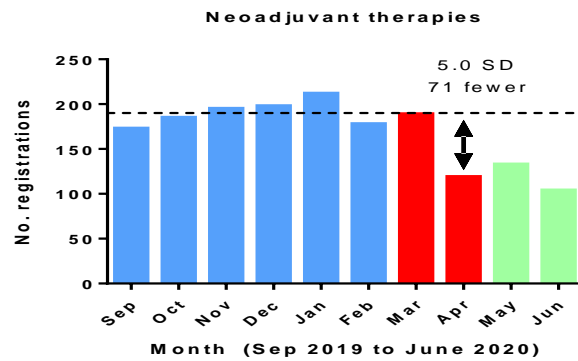

Figure S1. The number of SACT registrations observed per month, according to type of therapy. The number seen in April 2020 is compared with the mean number between September 2019 and February 2020 (dashed horizontal line). The arrow shows the difference between April 2020 and the mean value, and also expressed as number of standard deviations (SD) from the mean. All reductions in April had  $p \leq 0.0001$  (all differences and p-values for May and June are in Supplementary Table 2).

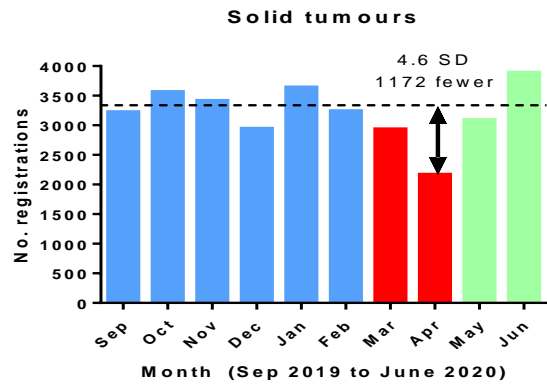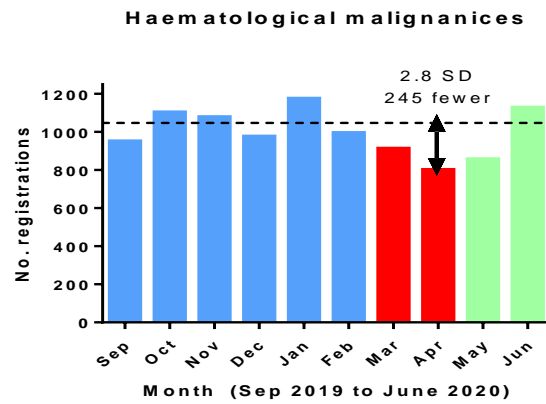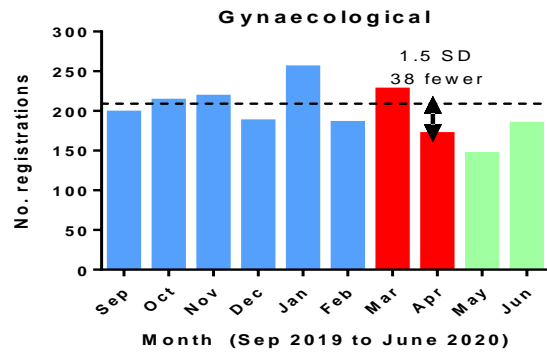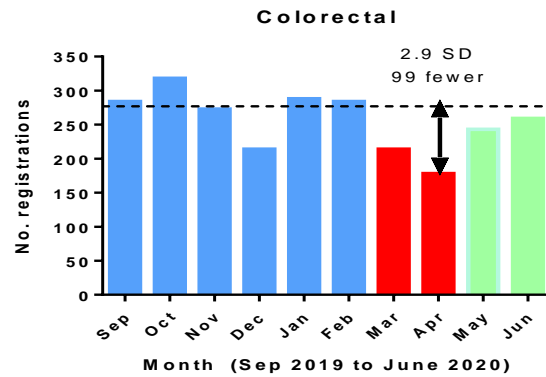

Figure S2. The number of SACT registrations observed per month, for all solid tumours and haematological malignancies, and gynaecological and colorectal cancers. The number seen in April 2020 is compared with the mean number between September 2019 and February 2020 (dashed horizontal line). The arrow shows the difference between April 2020 and the mean value, and also expressed as number of standard deviations (SD) from the mean. All reductions in April had  $p \leq 0.0001$  (all differences and p-values for May and June are in Supplementary Table 2).

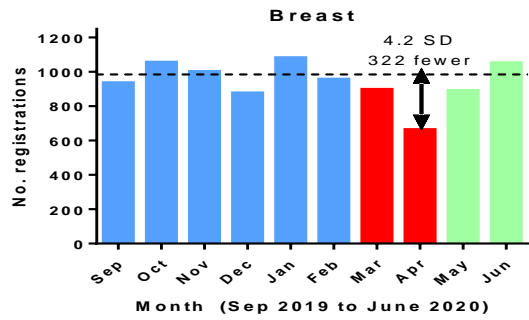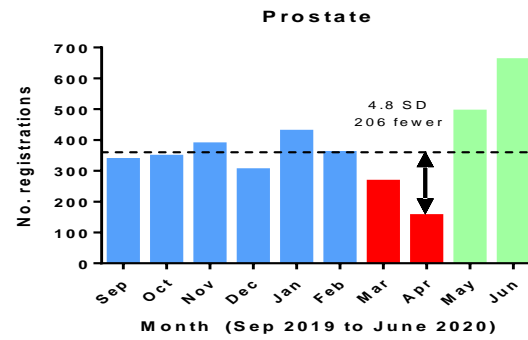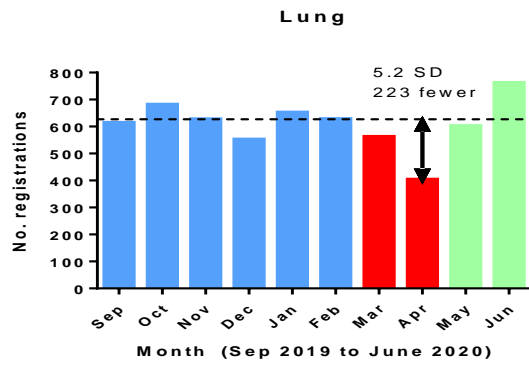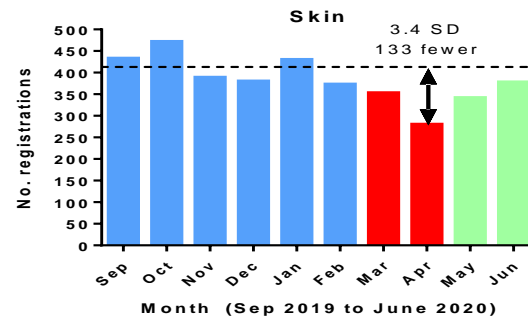

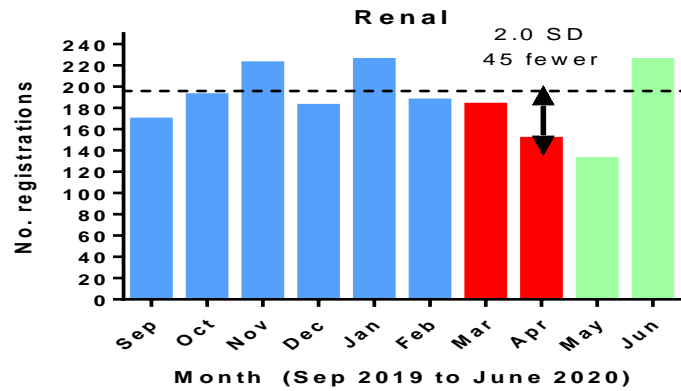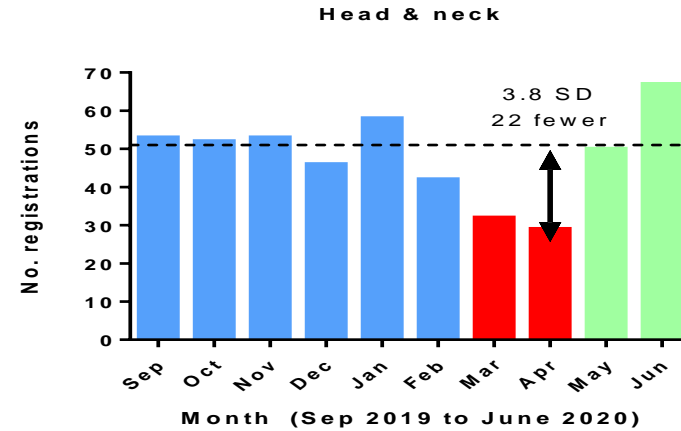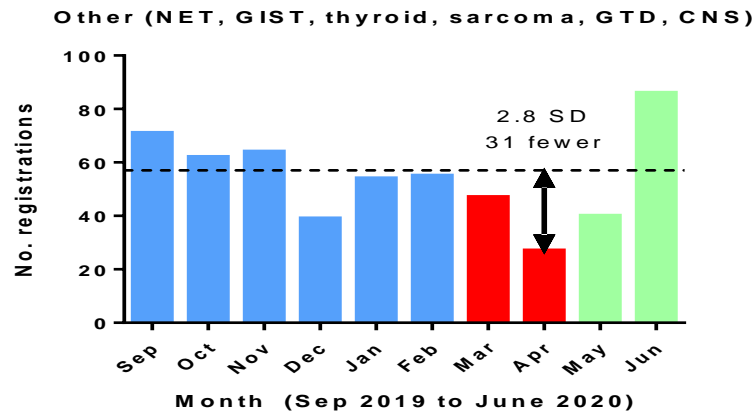

Figure S3. The number of SACT registrations observed per month for several solid tumour types. The number seen in April 2020 is compared with the mean number between September 2019 and February 2020 (dashed horizontal line). The arrow shows the difference between April 2020 and the mean value, and also expressed as number of standard deviations (SD) from the mean. All reductions in April had  $p \leq 0.0001$  (all differences and p-values for May and June are in Supplementary Table 2). Abbreviations: NET (neuroendocrine tumours), GIST (gastrointestinal stromal sarcomas), GTD (gestational trophoblastic disease), CNS (central nervous system tumours)

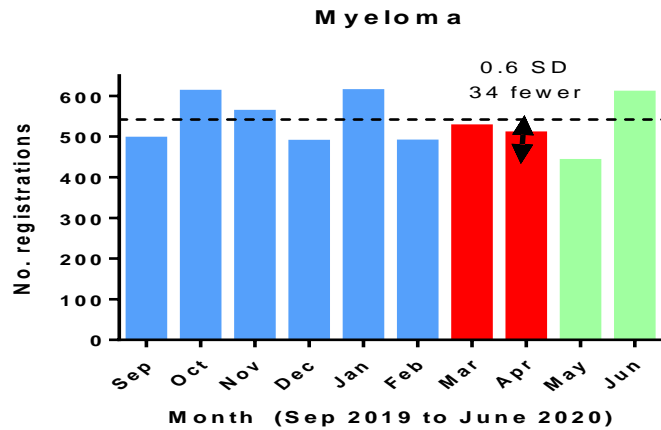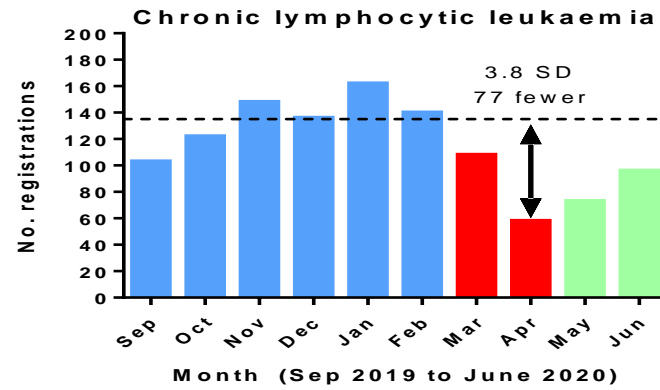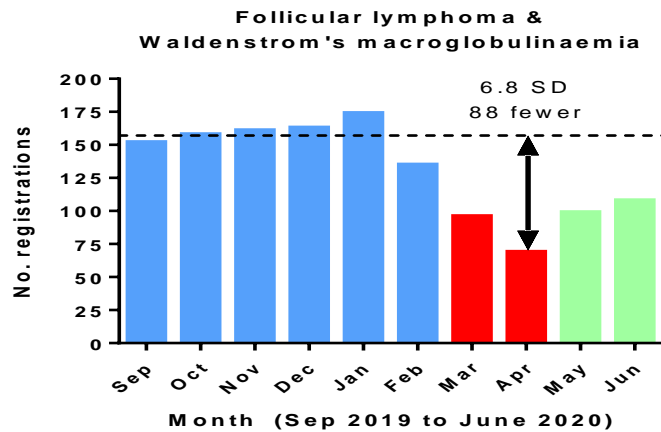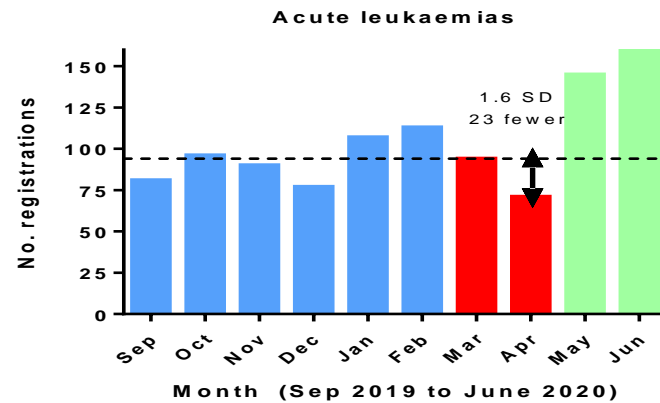

Figure S4. The number of SACT registrations observed per month, for haematological malignancies. The number seen in April 2020 is compared with the mean number between September 2019 and February 2020 (dashed horizontal line). The arrow shows the difference between April 2020 and the mean value, and also expressed as number of standard deviations (SD) from the mean. All reductions in April had  $p \leq 0.0001$  except acute leukaemias ( $p=0.001$ ) and myeloma ( $p=0.27$ ) (all differences and p-values for May and June are in Supplementary Table 2).

### All registrations

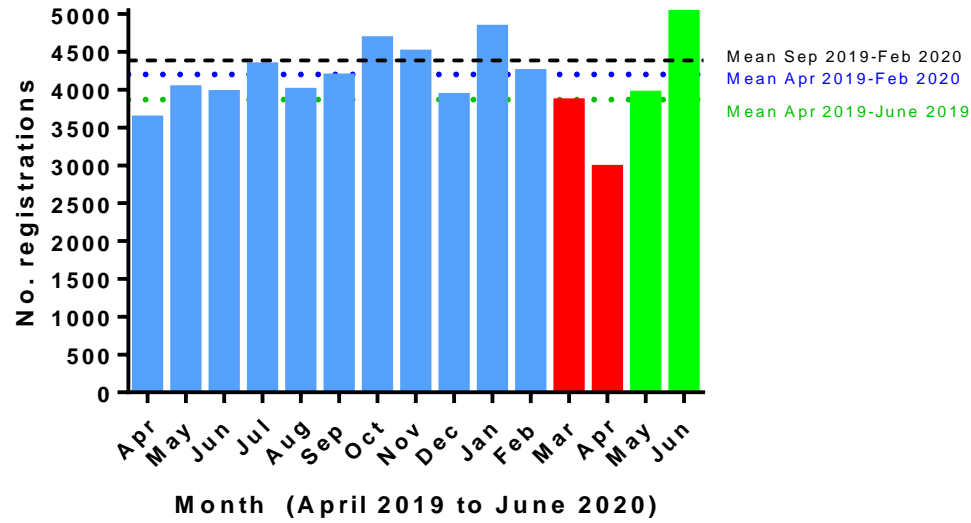

Figure S5. The total number of new SACT registrations from April 2019 to June 2020. The horizontal black dashed line represents the mean number of registrations for the control period used in the analyses (4386, for September 2019 to February 2020); the horizontal blue line represents the mean number for April 2019 to February 2020 (4203); the horizontal green line represents the mean number for April 2019 to June 2020 (3868).



Supplementary Table S1: New COVID indications introduced by the NHS via the Cancer Drugs Fund in April and May 2020 (available from <https://www.england.nhs.uk/cancer/cdf/cancer-drugs-fund-list/> - note this list is regularly updated)

| Drug                                                                       | Indication                                                                                                                                                                                                                                                                                                                                  | Date Available via CDF      |
|----------------------------------------------------------------------------|---------------------------------------------------------------------------------------------------------------------------------------------------------------------------------------------------------------------------------------------------------------------------------------------------------------------------------------------|-----------------------------|
| <b>Abiraterone</b> in combination with androgen deprivation therapy (ADT)  | <i>For the treatment of newly diagnosed high risk metastatic hormone-sensitive prostate cancer in patients either in whom enzalutamide is contraindicated or who are intolerant of enzalutamide and cannot or should not or have chosen not to receive docetaxel or would have received docetaxel had the COVID19 pandemic not occurred</i> | May 5 <sup>th</sup> 2020    |
| <b>Atezolizumab</b>                                                        | <i>As first line treatment for locally advanced or metastatic urothelial cancer instead of chemotherapy (as a consequence of the COVID19 pandemic)</i>                                                                                                                                                                                      | April 28 <sup>th</sup> 2020 |
| <b>Brentuximab</b>                                                         | <i>For brentuximab-naïve relapsed/refractory Hodgkin lymphoma following 1 prior therapy when cytotoxic chemotherapy is not a treatment option (because of the Covid19 pandemic) in adult patients</i>                                                                                                                                       | April 28 <sup>th</sup> 2020 |
| <b>Brentuximab</b>                                                         | <i>For brentuximab-naïve relapsed/refractory Hodgkin lymphoma following at least 1 prior therapy when autologous stem cell transplant or multi-agent chemotherapy is not a treatment option in child patients</i>                                                                                                                           | April 28 <sup>th</sup> 2020 |
| <b>Enzalutamide</b> in combination with androgen deprivation therapy (ADT) | <i>For the treatment of newly diagnosed metastatic hormone-sensitive prostate cancer in patients who cannot or should not or have chosen not to receive docetaxel or would have received docetaxel had the COVID19 pandemic not occurred</i>                                                                                                | May 5 <sup>th</sup> 2020    |
| <b>Gilteritinib</b>                                                        | <i>For treating relapsed/refractory FLT3 mutation positive acute myeloid leukaemia in adults</i>                                                                                                                                                                                                                                            | April 28 <sup>th</sup> 2020 |
| <b>Ibrutinib</b>                                                           | <i>For the 1st line treatment, instead of chemotherapy, of mantle cell lymphoma in patients who have not previously received any prior systemic therapy</i>                                                                                                                                                                                 | April 28 <sup>th</sup> 2020 |
| <b>Ixazomib with lenalidomide and dexamethasone</b>                        | <i>For treating relapsed or refractory multiple myeloma in patients who have had 1 prior line of therapy</i>                                                                                                                                                                                                                                | May 22 <sup>nd</sup> 2020   |
| <b>Lenalidomide</b> (in combination with dexamethasone)                    | <i>As 1st line treatment in transplant eligible patients with multiple myeloma</i>                                                                                                                                                                                                                                                          | April 12 <sup>th</sup> 2020 |
| <b>Lenalidomide</b> (in combination with dexamethasone)                    | <i>As 2nd line treatment in patients with multiple myeloma previously not treated with a 1st line bortezomib-containing regimen</i>                                                                                                                                                                                                         | April 12 <sup>th</sup> 2020 |
| <b>Lenalidomide</b> in combination with subcutaneous (SC) rituximab        | <i>For previously treated follicular lymphoma (grades 1-3a)</i>                                                                                                                                                                                                                                                                             | April 28 <sup>th</sup> 2020 |
| <b>Nab-paclitaxel</b>                                                      | <i>Paclitaxel as albumin-bound nanoparticles (nab-paclitaxel) instead of either paclitaxel or docetaxel in breast cancer regimens</i>                                                                                                                                                                                                       | April 14 <sup>th</sup> 2020 |
| <b>Niraparib</b>                                                           | <i>As treatment without preceding chemotherapy in patients with high grade epithelial ovarian, fallopian tube or primary peritoneal carcinoma who have a deleterious or suspected deleterious germline and/or somatic BRCA mutation and who have a recent FIRST RELAPSE of platinum-sensitive disease</i>                                   | April 14 <sup>th</sup> 2020 |
| <b>Nivolumab</b>                                                           | <i>For the treatment of advanced renal cell carcinoma as a first line single agent without ipilimumab</i>                                                                                                                                                                                                                                   | April 14 <sup>th</sup> 2020 |
| <b>Nivolumab</b>                                                           | <i>For the treatment of relapsed or refractory classical Hodgkin lymphoma in adults following treatment with brentuximab and with no previous stem cell transplantation</i>                                                                                                                                                                 | April 28 <sup>th</sup> 2020 |
| <b>Nivolumab</b>                                                           | <i>For treating relapsed or refractory classical Hodgkin Lymphoma in paediatric patients following treatment with brentuximab and with no previous stem cell transplantation</i>                                                                                                                                                            | April 28 <sup>th</sup> 2020 |
| <b>Nivolumab</b> (in combination with ipilimumab)                          | <i>For the 2nd line treatment of intermediate or poor risk advanced renal cell carcinoma</i>                                                                                                                                                                                                                                                | April 12 <sup>th</sup> 2020 |
| <b>Nivolumab</b>                                                           | <i>For treating metastatic colorectal cancer for patients with high microsatellite instability (MSI-H) or mismatch repair deficiency (dMMR)</i>                                                                                                                                                                                             | April 28 <sup>th</sup> 2020 |
| <b>Olaparib</b> (in its tablet formulation)                                | <i>As treatment without preceding chemotherapy as treatment in patients with high grade epithelial ovarian, fallopian tube or primary peritoneal carcinoma who have a deleterious or suspected deleterious germline and/or somatic BRCA mutation and who have a recent first</i>                                                            | April 14 <sup>th</sup> 2020 |

|                                                                                                                  |                                                                                                                                                                                                                                                                                                            |                             |
|------------------------------------------------------------------------------------------------------------------|------------------------------------------------------------------------------------------------------------------------------------------------------------------------------------------------------------------------------------------------------------------------------------------------------------|-----------------------------|
|                                                                                                                  | <i>relapse of platinum-sensitive disease</i>                                                                                                                                                                                                                                                               |                             |
| <b>Osimertinib</b>                                                                                               | <i>For the first-line treatment of locally advanced or metastatic epidermal growth factor receptor mutation-positive non-small-cell lung cancer in adults</i>                                                                                                                                              | April 28 <sup>th</sup> 2020 |
| <b>Pembrolizumab</b>                                                                                             | <i>For treating untreated PD-L1-positive metastatic non-small-cell lung cancer for patients with a PD-L1 tumour proportion score [TPS] between 1% and 49%</i>                                                                                                                                              | April 12 <sup>th</sup> 2020 |
| <b>Pembrolizumab</b> (in combination with pemetrexed based combination chemotherapy)                             | <i>For treating untreated PD-L1-positive or negative locally advanced or metastatic non-squamous non-small-cell lung cancer followed by single agent pembrolizumab maintenance without pemetrexed maintenance</i>                                                                                          | April 12 <sup>th</sup> 2020 |
| <b>Pembrolizumab</b>                                                                                             | <i>As treatment for Gestational Trophoblastic Neoplasia instead of chemotherapy</i>                                                                                                                                                                                                                        | April 28 <sup>th</sup> 2020 |
| <b>Pembrolizumab</b>                                                                                             | <i>For the 1st line treatment of PD-L1 positive metastatic or unresectable recurrent squamous cell carcinoma of the head and neck (instead of 1st line chemotherapy)</i>                                                                                                                                   | April 28 <sup>th</sup> 2020 |
| <b>Pertuzumab</b> (in combination with trastuzumab only)                                                         | <i>For the first line treatment of locally advanced or metastatic breast cancer</i>                                                                                                                                                                                                                        | April 12 <sup>th</sup> 2020 |
| <b>Pertuzumab (neoadjuvant)</b>                                                                                  | <i>In node positive patients for the neoadjuvant treatment of locally advanced, inflammatory or early breast cancer at high risk of recurrence</i>                                                                                                                                                         | April 12 <sup>th</sup> 2020 |
| <b>Pertuzumab (neoadjuvant)</b>                                                                                  | <i>In patients who are node negative or of unknown nodal status for the neoadjuvant treatment of locally advanced, inflammatory or early breast cancer at high risk of recurrence</i>                                                                                                                      | April 12 <sup>th</sup> 2020 |
| <b>Pertuzumab</b> (in combination with intravenous trastuzumab)                                                  | <i>As adjuvant therapy for axillary node positive HER2-positive early breast cancer and with NO preceding neoadjuvant therapy</i>                                                                                                                                                                          | April 12 <sup>th</sup> 2020 |
| <b>Pertuzumab</b> (in combination with intravenous trastuzumab)                                                  | <i>As adjuvant therapy for patients with HER2-positive early breast cancer which was diagnosed as being node positive prior to neoadjuvant treatment and has now completed neoadjuvant pertuzumab in combination with trastuzumab and surgery</i>                                                          | April 12 <sup>th</sup> 2020 |
| <b>Pertuzumab</b> (in combination with intravenous trastuzumab)                                                  | <i>As adjuvant therapy for HER2-positive early breast cancer patients thought to be node negative or of unknown nodal status prior to neoadjuvant pertuzumab plus trastuzumab and found to be axillary node positive after completion of neoadjuvant pertuzumab plus trastuzumab and surgery</i>           | April 12 <sup>th</sup> 2020 |
| <b>Polatuzumab vedotinin</b> combination with either bendamustine and rituximab or rituximab as bridging therapy | <i>For CAR T cell therapy in diffuse large B cell lymphoma and primary mediastinal B cell lymphoma patients formally accepted by the National CAR-T cell Clinical Panel for CAR-T cell therapy</i>                                                                                                         | May 4 <sup>th</sup> 2020    |
| <b>Pomalidomide</b> (in combination with dexamethasone)                                                          | <i>For the treatment of relapsed and refractory multiple myeloma after a lenalidomide-containing regimen</i>                                                                                                                                                                                               | April 12 <sup>th</sup> 2020 |
| <b>Rucaparib</b>                                                                                                 | <i>Without preceding chemotherapy treatment in patients with high grade epithelial ovarian, fallopian tube or primary peritoneal carcinoma who have a deleterious or suspected deleterious germline and/or somatic BRCA mutation and who have had a recent first relapse of platinum-sensitive disease</i> | April 14 <sup>th</sup> 2020 |
| <b>Venetoclax</b> with either azacitidine or cytarabine                                                          | <i>For untreated adult acute myeloid leukaemia (AML) instead of standard induction chemotherapy with daunorubicin and cytarabine</i>                                                                                                                                                                       | April 28 <sup>th</sup> 2020 |

Supplementary Table S2. Data used to create the figures

|                                              | Sept 2019 – Feb 2020<br>(control period) |       | March<br>2020 | April 2020 |             |                  |         | May 2020 |             |                  |         | June 2020 |          |                  |         |
|----------------------------------------------|------------------------------------------|-------|---------------|------------|-------------|------------------|---------|----------|-------------|------------------|---------|-----------|----------|------------------|---------|
|                                              | Mean                                     | SD    | Number        | Number     | %<br>change | SD<br>difference | P-value | Number   | %<br>change | SD<br>difference | P-value | Number    | % change | SD<br>difference | P-value |
| Total                                        | 4385.8                                   | 334.9 | 3847          | 2969       | -32         | -4.2             | <0.0001 | 3950     | -10         | -1.3             | <0.0001 | 5022      | 15       | 1.9              | <0.0001 |
| Curative                                     | 172.2                                    | 14.3  | 160           | 144        | -16         | -2.0             | 0.012   | 216      | 25          | 3.1              | <0.0001 | 277       | 61       | 7.3              | <0.0001 |
| Adjuvant                                     | 270.8                                    | 23.0  | 255           | 207        | -24         | -2.8             | <0.0001 | 303      | 12          | 1.4              | 0.071   | 290       | 7        | 0.8              | 0.512   |
| Neoadjuvant                                  | 190.2                                    | 14.4  | 189           | 119        | -37         | -5.0             | <0.0001 | 133      | -30         | -4.0             | <0.0001 | 104       | -45      | -6.0             | <0.0001 |
| Non-curative (total)                         | 3739.7                                   | 299.9 | 3223          | 2449       | -35         | -4.3             | <0.0001 | 3196     | -15         | -1.8             | <0.0001 | 4233      | 13       | 1.6              | <0.0001 |
| Non-curative 1 <sup>st</sup> line            | 1797.0                                   | 110.3 | 1612          | 1265       | -30         | -4.8             | <0.0001 | 1780     | -1          | -0.2             | 0.936   | 2291      | 27       | 4.5              | <0.0001 |
| Non-curative 2 <sup>nd</sup> line            | 1200.7                                   | 131.2 | 1006          | 774        | -36         | -3.3             | <0.0001 | 896      | -25         | -2.3             | <0.0001 | 1256      | 5        | 0.4              | 0.213   |
| Non-curative 3 <sup>rd</sup> or more<br>line | 742.0                                    | 69.5  | 605           | 410        | -45         | -4.8             | <0.0001 | 520      | -30         | -3.2             | <0.0001 | 686       | -8       | -0.8             | 0.028   |
| Oral drugs                                   | 1762.3                                   | 152.0 | 1685          | 1453       | -18         | -2.0             | <0.0001 | 1812     | 3           | 0.3              | 0.490   | 2263      | 28       | 3.3              | <0.0001 |
| Immunotherapies                              | 821.5                                    | 59.3  | 661           | 500        | -39         | -5.4             | <0.0001 | 736      | -10         | -1.4             | <0.0001 | 879       | 7        | 1.0              | 0.052   |
| Chemo-immunotherapy                          | 201.5                                    | 13.4  | 193           | 124        | -38         | -5.8             | <0.0001 | 195      | -3          | -0.5             | 0.915   | 334       | 66       | 9.9              | <0.0001 |
| Chemotherapies                               | 1089.0                                   | 108.9 | 825           | 533        | -51         | -5.1             | <0.0001 | 770      | -29         | -2.9             | <0.0001 | 1068      | -2       | -0.2             | 0.838   |
| Intravenous drugs                            | 2621.2                                   | 185.2 | 2157          | 1515       | -42         | -6.0             | <0.0001 | 2137     | -18         | -2.6             | <0.0001 | 2758      | 5        | 0.7              | 0.001   |
| Solid tumours                                | 3338.7                                   | 255.8 | 2934          | 2167       | -35         | -4.6             | <0.0001 | 3092     | -7          | -1.0             | <0.0001 | 3893      | 17       | 2.2              | <0.0001 |
| Haematological<br>malignancies               | 1047.2                                   | 86.7  | 913           | 802        | -23         | -2.8             | <0.0001 | 858      | -18         | -2.2             | <0.0001 | 1129      | 8        | 0.9              | 0.002   |

- Mean and SD: mean and standard deviation (SD) of the number of registrations between Sep 2019 and Feb 2020 (the control period)
- Number: number of registrations in the month.
- Percentage change: number of registrations in the month expressed as a percentage of the mean for the control period (relative change)
- SD difference is the number of registrations minus mean number for the control period, divided by the SD (control period).
- P-values comes from a chi-squared test for comparing two counts: comparing the number registrations with the mean number for the control period. No adjustment was made for multiple analyses (3 time points and 35 rows in the table). However, those that are <0.0001 would be largely unaffected by not being adjusted with regards to statistical significance because  $p=0.0001$  multiplied by  $3 \times 35$  analyses still yields  $p=0.01$  which is <0.05.

Supplementary Table S2 continued

|                                                       | Sept 2019 – Feb 2020<br>(control period) |      | March<br>2020 | April 2020 |             |                  |         | May 2020 |             |                  |         | June 2020 |          |                  |         |
|-------------------------------------------------------|------------------------------------------|------|---------------|------------|-------------|------------------|---------|----------|-------------|------------------|---------|-----------|----------|------------------|---------|
|                                                       | Mean                                     | SD   | Number        | Number     | %<br>change | SD<br>difference | P-value | Number   | %<br>change | SD<br>difference | P-value | Number    | % change | SD<br>difference | P-value |
| Breast                                                | 985.0                                    | 76.9 | 897           | 663        | -33         | -4.2             | <0.0001 | 891      | -10         | -1.2             | <0.0001 | 1053      | 7        | 0.9              | 0.023   |
| Prostate                                              | 360.0                                    | 43.2 | 266           | 154        | -57         | -4.8             | <0.0001 | 493      | 37          | 3.1              | <0.0001 | 660       | 83       | 6.9              | <0.0001 |
| Lung                                                  | 626.7                                    | 43.2 | 563           | 404        | -36         | -5.2             | <0.0001 | 603      | -4          | -0.5             | 0.649   | 763       | 22       | 3.2              | <0.0001 |
| Renal                                                 | 196.2                                    | 22.5 | 183           | 151        | -23         | -2.0             | <0.0001 | 132      | -33         | -2.8             | <0.0001 | 225       | 15       | 1.3              | 0.048   |
| Colorectal                                            | 276.8                                    | 34.3 | 214           | 178        | -36         | -2.9             | <0.0001 | 243      | -12         | -1.0             | 0.028   | 259       | -6       | -0.5             | 0.553   |
| Hepato-, pancreas and biliary tract                   | 105.5                                    | 11.9 | 102           | 71         | -33         | -2.9             | <0.0001 | 78       | -26         | -2.3             | <0.0001 | 126       | 19       | 1.7              | 0.069   |
| Gynaecological                                        | 209.3                                    | 26.1 | 227           | 171        | -18         | -1.5             | <0.0001 | 146      | -30         | -2.4             | <0.0001 | 184       | -12      | -1.0             | 0.103   |
| Head & neck                                           | 50.7                                     | 5.7  | 32            | 29         | -43         | -3.8             | <0.0001 | 50       | -1          | -0.1             | 0.996   | 67        | 32       | 2.9              | 0.023   |
| Urothelial                                            | 58.2                                     | 11.1 | 50            | 39         | -33         | -1.7             | <0.0001 | 72       | 24          | 1.3              | 0.142   | 91        | 56       | 3.0              | <0.0001 |
| Skin                                                  | 412.8                                    | 38.6 | 353           | 280        | -32         | -3.4             | <0.0001 | 342      | -17         | -1.8             | <0.0001 | 378       | -8       | -0.9             | 0.125   |
| Other (NET, GIST, Thyroid, Sarcoma, CNS)              | 57.5                                     | 11.0 | 47            | 27         | -53         | -2.8             | <0.0001 | 40       | -30         | -1.6             | 0.002   | 86        | 50       | 2.6              | <0.0001 |
| Myeloma                                               | 542.2                                    | 60.1 | 525           | 508        | -6          | -0.6             | 0.266   | 440      | -19         | -1.7             | <0.0001 | 608       | 12       | 1.1              | <0.0001 |
| Non-Hodgkins lymphoma, diffuse large B cell lymphoma  | 28.8                                     | 4.1  | 19            | 20         | -31         | -2.1             | 0.110   | 34       | 18          | 1.3              | 0.671   | 40        | 39       | 2.7              | 0.070   |
| Acute leukaemias                                      | 94.0                                     | 14.2 | 94            | 71         | -24         | -1.6             | 0.001   | 145      | 54          | 3.6              | <0.0001 | 160       | 70       | 4.6              | <0.0001 |
| Chronic lymphocytic leukaemia                         | 135.2                                    | 20.6 | 108           | 58         | -57         | -3.8             | <0.0001 | 73       | -46         | -3.0             | <0.0001 | 96        | -29      | -1.9             | <0.0001 |
| Follicular lymphoma, Waldenstrom's macroglobulinaemia | 157.2                                    | 13.0 | 96            | 69         | -56         | -6.8             | <0.0001 | 99       | -37         | -4.5             | <0.0001 | 108       | -31      | -3.8             | <0.0001 |
| Hodgkins lymphoma                                     | 20.8                                     | 5.9  | 22            | 25         | 20          | 0.7              | 0.705   | 12       | -42         | -1.5             | 0.017   | 44        | 111      | 3.9              | <0.0001 |
| Chronic myeloid leukaemia                             | 34.7                                     | 6.0  | 21            | 23         | -34         | -1.9             | 0.018   | 19       | -45         | -2.6             | <0.0001 | 28        | -19      | -1.1             | 0.478   |
| Mantle cell lymphoma                                  | 31.2                                     | 2.4  | 25            | 25         | -20         | -2.6             | 0.498   | 35       | 12          | 1.6              | 0.824   | 39        | 25       | 3.3              | 0.382   |
| Myelodysplastic syndromes                             | 3.2                                      | 1.5  | 3             | 3          | -5          | -0.1             | -       | 1        | -68         | -1.5             | 0.260   | 6         | 89       | 1.9              | -       |

- NET (neuroendocrine tumours), GIST (gastrointestinal stromal tumors), GTD (gestational trophoblastic disease), CNS (central nervous system)
